# Supplementary material for: Biomimetic morphogenesis of micropottery: helical coiling of mesostructured silica nanofibers
Source: Royal Society of Chemistry journal article supplement (doi:10.1039/c1sm05593c), 2011-01-01
Supplement: c1sm05593c.pdf [file c1sm05593c.pdf]

# Biomimetic morphogenesis of micropottery: Helical coiling of mesostructured silica nanofibers

Longping Zhou, Jianfeng Ye, Guosong Hong and Limin Qi\*

*Beijing National Laboratory for Molecular Sciences (BNLMS), State Key Laboratory for  
Structural Chemistry of Unstable and Stable Species, College of Chemistry, Peking  
University, Beijing 100871, China. E-mail: liminqi@pku.edu.cn*

## Supporting Information

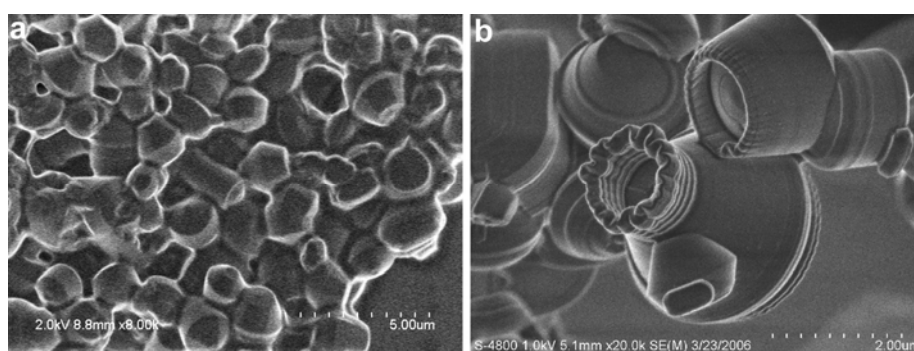

**Fig. S1** SEM images of mesostructured silica products obtained in the presence of 1.75 M  $\text{HNO}_3$  after different reaction times: (a) 20 min, (b) 3 h.

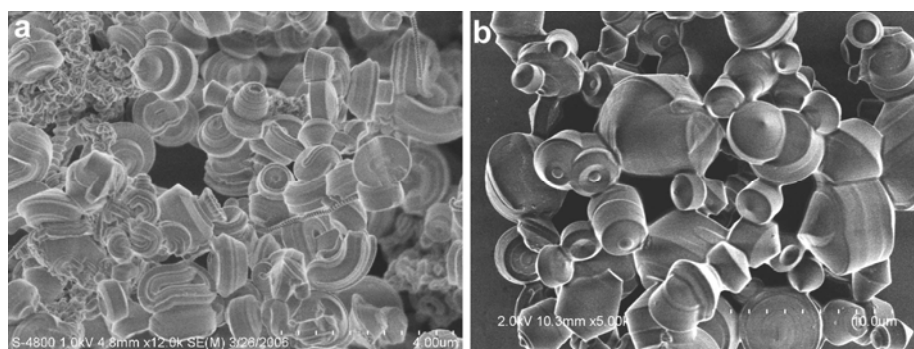

**Fig. S2** SEM images of mesostructured silica products obtained in the presence of different acids (1.75 M): (a)  $\text{HBr}$ , (b)  $\text{HCl}$ .

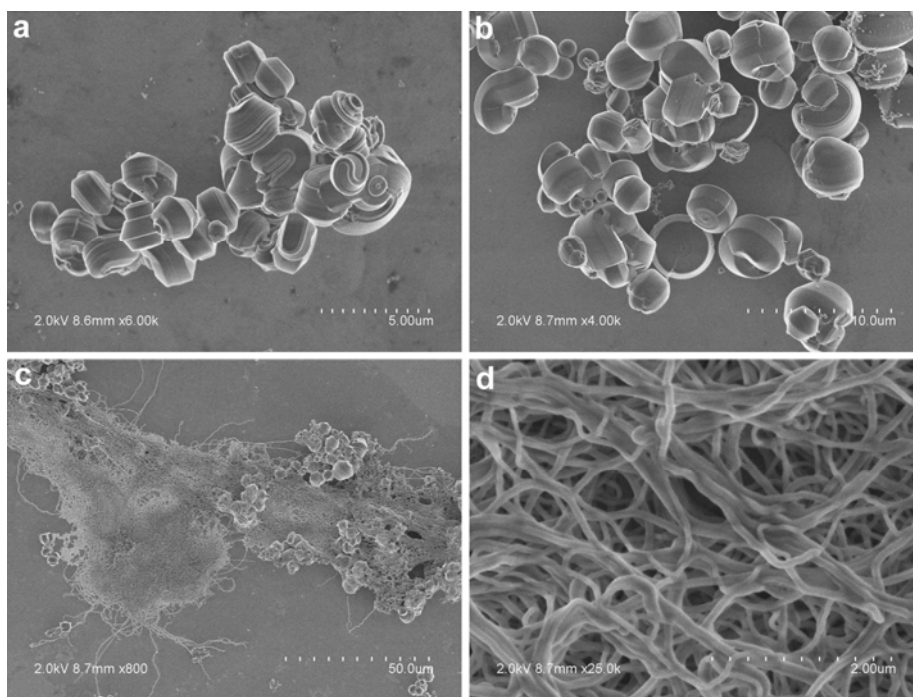

**Fig. S3** SEM images of mesostructured silica products obtained in the presence of  $\text{HNO}_3$  with different concentrations: (a) 0.7 M, (b) 0.35 M, (c,d) 0.175 M.
